1 **Main Manuscript for**  
2 **Differential effects of Wnt- $\beta$ -catenin signaling in Purkinje cells and Bergmann**  
3 **glia in SCA1**  
4  
5

6 **Authors:** Kimberly Luttik<sup>1,2</sup>, Leon Tejwani<sup>1,2</sup>, Hyoungseok Ju<sup>3</sup>, Terri Driessen<sup>3</sup>, Cleo Smeets<sup>3</sup>,  
7 Janghoo Lim<sup>1,2,3,4,5,\*</sup>  
8

9 **Affiliations:**

10 <sup>1</sup>Interdepartmental Neuroscience Program, Yale School of Medicine, New Haven, CT 06510, USA

11 <sup>2</sup>Department of Neuroscience, Yale School of Medicine, New Haven, CT 06510, USA

12 <sup>3</sup>Department of Genetics, Yale School of Medicine, New Haven, CT 06510, USA

<sup>4</sup>Program in Cellular Neuroscience, Neurodegeneration and Repair, Yale School of Medicine,  
New Haven, CT 06510, USA

<sup>5</sup>Yale Stem Cell Center, Yale School of Medicine, New Haven, CT 06510, USA

13

14 \*Corresponding author: Dr. Janghoo Lim, 295 Congress Avenue, BCMM 154E, New Haven CT  
15 06510. Email: [janghoo.lim@yale.edu](mailto:janghoo.lim@yale.edu), Phone: (203) 737-6268.  
16

17 **Author Contributions:** K.L., L.T., H.J., and J.L. conceived and designed the study. K.L., L.T.,  
18 H.J., T.D., and C.S. performed the experiments. K.L., L.T., H.J., T.D., and C.S. analyzed the data.  
19 K.L., L.T., and J.L. wrote the manuscript. All authors reviewed the manuscript and provided  
20 comments.  
21

22 **Competing interest statement:** The authors declare no competing interest.  
23

24 **Classification:** Biological Sciences, Neuroscience  
25

26 **Keywords:** spinocerebellar ataxia type 1, SCA1, neurodegeneration, Wnt signaling, Purkinje  
27 cells, Bergmann glia  
28

29 **This PDF file includes:**

30 Main Text

31 Figures 1 to 6

## 32 **Abstract**

33 Spinocerebellar ataxia type 1 (SCA1) is a dominantly inherited neurodegenerative disease  
34 characterized by progressive ataxia and degeneration of specific neuronal populations, including  
35 Purkinje cells (PCs) in the cerebellum. Previous studies have demonstrated a critical role for  
36 various evolutionarily conserved signaling pathways in cerebellar patterning, such as the Wnt- $\beta$ -  
37 catenin pathway; however, the roles of these pathways in adult cerebellar function and cerebellar  
38 neurodegeneration are largely unknown. In this study, we found that Wnt- $\beta$ -catenin activity was  
39 progressively enhanced in multiple cell types in the adult SCA1 mouse cerebellum, and that  
40 activation of this signaling occurs in an ataxin-1 polyglutamine (polyQ) expansion-dependent  
41 manner. Genetic manipulation of the Wnt- $\beta$ -catenin signaling pathway in specific cerebellar cell  
42 populations revealed that activation of Wnt- $\beta$ -catenin signaling in PCs alone was not sufficient to  
43 induce SCA1-like phenotypes, while its activation in astrocytes including Bergmann glia (BG)  
44 resulted in gliosis and disrupted BG localization, which was replicated in SCA1 mouse models.  
45 Our studies identify a novel mechanism in which polyQ-expanded ataxin-1 positively regulates  
46 Wnt- $\beta$ -catenin signaling, and demonstrate that different cell types have distinct responses to the  
47 enhanced Wnt- $\beta$ -catenin signaling in the SCA1 cerebellum, underscoring an important role of BG  
48 in SCA1 pathogenesis.

## 49 **Significance statement**

51 The mechanisms underlying the degeneration of specific cellular populations in various  
52 neurodegenerative disorders remain unknown. Here, we show that the polyQ expansion of ataxin-  
53 1 activates the Wnt- $\beta$ -catenin signaling pathway in various cell types, including Purkinje cells and  
54 Bergmann glia, in the cerebellum of SCA1 mouse models. We used conditional mouse genetics  
55 to activate and silence this pathway in different cell types and found elevated activity of this  
56 signaling pathway impacted Bergmann glia and Purkinje cell populations differently. This study  
57 highlights the important role of Wnt- $\beta$ -catenin signaling pathway in glial cell types for SCA1  
58 pathogenesis.

## 59 **Introduction**

61 Spinocerebellar ataxia type 1 (SCA1) is an adult-onset neurodegenerative disorder caused by a  
62 trinucleotide repeat expansion of a glutamine-encoding CAG tract in *ATXN1*<sup>1</sup>. In SCA1, specific  
63 neuronal populations degenerate at later stages of disease, including cerebellar Purkinje cells  
64 (PCs), brainstem cranial nerve nuclei, and inferior olive neurons<sup>2</sup>. Although ataxia-related motor  
65 changes typically manifest during adulthood, animal models of SCA1 have revealed substantial  
66 molecular and circuit-level alterations in the cerebellum at time points prior to the onset of robust  
67 behavioral deficits<sup>3-8</sup>, suggesting developmental abnormalities can contribute to long-term  
68 cerebellar health and SCA1 pathogenesis. Furthermore, although *ATXN1* is ubiquitously  
69 expressed throughout the brain<sup>9-11</sup>, the cellular and molecular mechanisms leading to the  
70 selective degeneration of specific cell types is largely unknown.

72 Among the different signaling pathways that have been identified through unbiased profiling of  
73 ataxia animal models, several studies suggest that components of the Wnt signaling pathway are  
74 perturbed in SCA1 and other forms of ataxia, with ataxin-1 and ataxin-3 null mice exhibiting altered  
75 expression of genes involved in the Wnt signaling pathway<sup>8, 12-14</sup>. The Wnt signaling pathway is  
76 comprised of three highly conserved signal transduction pathways: the canonical Wnt- $\beta$ -catenin  
77 pathway, and the noncanonical Wnt-planar cell polarity and Wnt-calcium pathways<sup>15</sup>. Within the  
78 cerebellum, the canonical Wnt- $\beta$ -catenin pathway plays crucial roles in regulating the proliferation,  
79 migration, and differentiation of diverse cell types during cerebellar morphogenesis<sup>16-23</sup>. Previous  
80 studies have shown that aberrant activation of Wnt- $\beta$ -catenin signaling in cerebellar granule  
81 precursor cells can inhibit their proliferation, prompting precocious differentiation during  
82 development<sup>21</sup>. Additionally, a number of genes encoding key components in the Wnt- $\beta$ -catenin

83 signaling pathway, including *Apc*, *Gsk3 $\beta$* , *Cttnb1* (encoding  $\beta$ -catenin), and *Lef-1*, as well as its  
84 target genes, including *Ccnd1* and *Myc*, are expressed in adult PCs<sup>9, 24, 25</sup>. Together, these studies  
85 indicate that Wnt- $\beta$ -catenin signaling is active and is homeostatically regulated in the cerebellum  
86 during development and into adulthood. Thus, although it is clear that Wnt plays a fundamental  
87 role in establishing proper cerebellar cytoarchitecture, the precise physiological role of persistent  
88 Wnt signaling in different cell types of the adult cerebellum remains elusive. Furthermore, the  
89 nature of Wnt- $\beta$ -catenin signaling perturbation and the functional implications of this dysregulation  
90 in the SCA1 cerebellum at various stages of disease are unclear.

91  
92 In this study, we demonstrate that Wnt- $\beta$ -catenin signaling is activated in multiple cerebellar cell  
93 types in an age-dependent manner *in vivo* in SCA1 through both cell autonomous and non-cell  
94 autonomous mechanisms. We identified a novel molecular mechanism through which ataxin-1  
95 positively regulates Wnt- $\beta$ -catenin signaling in a polyglutamine (polyQ)-dependent manner to cell  
96 autonomously enhance Wnt target gene expression in PCs. Interestingly, expression of polyQ-  
97 expanded ataxin-1 specifically in PCs also resulted in increased production of multiple secreted  
98 Wnt ligands and higher Wnt activity in other cell populations, including Bergmann glia (BG). To  
99 understand the impact of Wnt signaling in these different cerebellar cell types, we used conditional  
100 mouse genetics approaches to manipulate levels of Wnt- $\beta$ -catenin signaling in a cell-type specific  
101 manner in SCA1 mouse models. Our data revealed differential effects of Wnt- $\beta$ -catenin signaling  
102 in different cell types, with perturbations in Wnt signaling in BG having a greater impact on overall  
103 cerebellar health than in PCs. Taken together, these data describe the effect of altering Wnt  
104 signaling in different cell types in the adult cerebellum and support a role for BG in the progressive  
105 cerebellar dysfunction observed in SCA1.

## 106 107 **Results**

### 108 109 **Wnt- $\beta$ -catenin signaling is enhanced in the SCA1 cerebellum**

110 Due to the well-defined role of Wnt- $\beta$ -catenin signaling (Figure 1A) in cerebellar circuit formation<sup>16-</sup>  
111 <sup>23</sup>, and the involvement of developmental changes in long-term cerebellar health in SCA1<sup>4, 5</sup>, we  
112 sought to interrogate if and how Wnt- $\beta$ -catenin signaling is involved in SCA1 at various stages of  
113 disease progression. To this end, we first examined Wnt- $\beta$ -catenin signaling in SCA1 knock-in  
114 mice that express *Atn1* containing 154 CAG repeats under the control of its endogenous  
115 promoter (*Atn1*<sup>154Q/2Q</sup>; SCA1 KI<sup>26</sup>). Gene expression of Wnt- $\beta$ -catenin target genes *Ccnd1* and  
116 *c-Myc* was upregulated *in vivo* in the SCA1 KI cerebellum in an age-dependent manner, with  
117 elevated expression at 30 weeks but not at 6 weeks (Figure 1B).

118  
119 To determine the specific cell types in which Wnt signaling is activated in SCA1, we utilized a  
120 transgenic reporter mouse (TCF/Lef:H2B-GFP) for the Wnt- $\beta$ -catenin signaling pathway that uses  
121 a minimal promoter containing six TCF binding sites to express a H2B-GFP fusion protein upon  
122 canonical Wnt activation (Figure 1C,D)<sup>27</sup>. We crossed SCA1 KI mice with TCF/Lef:H2B-GFP mice  
123 and examined reporter activity in the cerebellum at 19 weeks of age, a timepoint in which  
124 substantial gene expression changes have been reported (Figure 1E,F)<sup>28</sup>. Wild-type (WT) reporter  
125 animals showed a baseline level of Wnt signaling reporter activity in multiple cell types in adult  
126 cerebellum, including PCs (as indicated by the PC marker calbindin, *calb1*), as well as  
127 surrounding cell types in the granule cell layer and molecular layer (Figure 1D,E), supporting  
128 previous studies demonstrating that Wnt signaling persists into adulthood. SCA1 KI reporter mice  
129 exhibited an increased average GFP intensity (Figure 1F,G) and increased proportion of PCs with  
130 higher intensity of Wnt- $\beta$ -catenin signaling reporter activity in the cerebellum (Figure 1F,H).  
131 Additionally, increase in reporter fluorescence was observed in other surrounding cell types in the  
132 molecular layer, PC layer, and granular cell layer of the SCA1 KI cerebellum relative to WT  
133 reporter animals (Figure 1E,F). Collectively, these results demonstrate that expression of polyQ-

134 expanded ataxin-1 in the cerebellum increases canonical Wnt signaling activity in multiple  
135 different cerebellar cell types during SCA1 disease progression.

### 136 137 **Ataxin-1 positively regulates Wnt- $\beta$ -catenin signaling in a polyQ-dependent manner**

138 To determine the mechanism through which polyQ-expanded ataxin-1 affects the transcriptional  
139 output of Wnt- $\beta$ -catenin signaling (Figure 2A), we utilized an established  $\beta$ -catenin-responsive  
140 luciferase reporter, superTOPFlash<sup>29</sup> (Figure 2B), which is activated by diverse upstream  
141 activators, including Wnt ligands, Dishevelled, LiCl (inhibitor of GSK3 $\beta$ , a negative regulator of  
142 Wnt- $\beta$ -catenin signaling), and  $\beta$ -catenin (Figure 2A). Transfection of polyQ-expanded ataxin-1  
143 strongly enhanced superTOPFlash activity in HeLa cells treated with Wnt3A conditioned media  
144 (Figure 2C), confirming our *in vivo* finding that polyQ-expanded ataxin-1 is able to enhance Wnt-  
145  $\beta$ -catenin signaling activity. To identify at which level(s) ataxin-1 modulates the Wnt- $\beta$ -catenin  
146 signaling pathway, we performed similar luciferase reporter assays using Wnt- $\beta$ -catenin signaling  
147 activators at different stages of the Wnt- $\beta$ -catenin signaling cascade, including Dishevelled-3  
148 transfection, LiCl treatment, and  $\beta$ -catenin transfection (Figure 2D-F). We observed that in the  
149 absence of active Wnt signaling, ataxin-1 alone did not alter superTOPFlash activation. However,  
150 in all cases in which Wnt signaling was active, ataxin-1 could further enhance the level of  
151 superTOPFlash activation (Figure 2C-F), suggesting that polyQ-expanded ataxin-1 likely  
152 operates in parallel with or downstream of  $\beta$ -catenin to enhance transcription of Wnt- $\beta$ -catenin  
153 target genes in SCA1.

154  
155 Transcriptional regulation of target genes in the canonical Wnt signaling pathway occurs via the  
156 coordination of  $\beta$ -catenin with several transcription factors following its translocation to the  
157 nucleus<sup>30</sup>. To further elucidate how ataxin-1 regulates Wnt- $\beta$ -catenin signaling, we performed co-  
158 affinity purification experiments to determine whether ataxin-1 physically interacts with the various  
159 transcription factors involved in canonical Wnt signaling, including  $\beta$ -catenin and TCF/LEF family  
160 members. Although canonical Wnt signaling requires  $\beta$ -catenin as a co-activator of transcription,  
161 no physical interaction between ataxin-1 and  $\beta$ -catenin was observed (Figure 2G). However, a  
162 physical interaction between ataxin-1 and TCF/LEF family members LEF1 (HUGO name LEF1),  
163 TCF1 (HUGO name TCF7), TCF3 (HUGO name TCF7L1), and TCF4 (HUGO name TCF7L2)  
164 was observed (Figure 2H-K). Interestingly, the interaction between ataxin-1 and Lef1 increased  
165 in a polyQ-dependent manner (Figure 2H), providing a potential molecular mechanism for cell  
166 autonomous ataxin-1-mediated Wnt- $\beta$ -catenin signaling activation in SCA1. Overall, these data  
167 demonstrate that mutant ataxin-1 can physically interact with multiple effectors of Wnt- $\beta$ -catenin  
168 target gene transcription and, in the presence of  $\beta$ -catenin, increase expression of downstream  
169 genes.

170  
171 The pathogenicity of ataxin-1 is dependent on several key features and domains of the protein,  
172 including polyQ expansion, serine 776-phosphorylation, and its nuclear localization signal<sup>31, 32</sup>.  
173 Therefore, we next investigated the involvement of these various features on Wnt induction by  
174 ataxin-1. First, longer ataxin-1 polyQ tract length resulted in increased superTOPFlash activation  
175 (Figure 2F). Additionally, polyQ-expanded ataxin-1 carrying mutations of a key phosphorylation  
176 site (S776A) or nuclear localization signal (K772T) abrogated the activation of Wnt- $\beta$ -catenin  
177 signaling by ataxin-1 (Figure 2L). Because polyQ expansion, phosphorylation at S776, and the  
178 ability to localize to the nucleus are crucial for ataxin-1 pathogenicity, and modulating any of these  
179 properties mitigated the effect of ataxin-1 on Wnt- $\beta$ -catenin signaling activation, these data reveal  
180 a novel mechanism through which pathogenic forms of ataxin-1 may contribute to transcriptional  
181 dysregulation in SCA1.

### 182 183 **PC-specific expression of polyQ-expanded ataxin-1 is sufficient to induce cerebellar Wnt- $\beta$ -catenin hyperactivation**



185 Next, to determine whether polyQ-expanded ataxin-1 can activate Wnt- $\beta$ -catenin signaling  
186 through cell autonomous mechanisms in PCs *in vivo*, we utilized a PC-specific transgenic mouse  
187 model of SCA1 in which polyQ-expanded ataxin-1 with 63 glutamine repeats was overexpressed  
188 in PCs (SCA1 Tg [63Q]), which was originated due to a germline contraction event from SCA1 Tg  
189 [82Q] line<sup>33</sup>. Similar to SCA1 KI mice, transcript levels of Wnt target genes *Ccnd1* and *c-Myc* were  
190 elevated in the cerebellum of SCA1 Tg [63Q] mice in an age-dependent manner compared to WT  
191 controls (Figure 3A). Interestingly, protein levels of active  $\beta$ -catenin, but not mRNA levels of  
192 *Ctnnb1*, were also elevated in the cerebellum of 30-week SCA1 Tg [63Q] mice (Figure 3B-D),  
193 suggesting post-transcriptional regulation of  $\beta$ -catenin levels by ataxin-1. Furthermore, we  
194 measured significant increases in GFP intensity, corresponding to Wnt- $\beta$ -catenin signaling  
195 reporter activity, in PCs of 12-week SCA1 Tg [63Q] mice crossed with TCF/Lef:H2B-GFP reporter  
196 mice, compared to control mice (Figure 3E-H). Surprisingly, we found that the increased activity  
197 of Wnt- $\beta$ -catenin signaling reporter was not only limited cell autonomously within the PCs of SCA1  
198 Tg [63Q] cerebellum, but also non-cell autonomously in other surrounding cell types in the PC  
199 layer, as well as molecular and granule cell layers (Figure 3E-F). Finally, we found that expression  
200 of certain secreted Wnt ligands was elevated at 30 weeks in SCA1 Tg [82Q] mice (Figure S1),  
201 which could contribute to the observed non-cell autonomous activation of Wnt signaling in  
202 surrounding cerebellar cell types. These data demonstrate that overexpression of polyQ-  
203 expanded ataxin-1 exclusively in PCs leads to enhanced activation of Wnt- $\beta$ -catenin signaling cell  
204 autonomously in PCs, as well as surrounding cell types of the SCA1 cerebellum through indirect,  
205 non-cell autonomous mechanisms.

#### 206 207 **Genetic manipulation of canonical Wnt signaling in PCs has minimal impact on cerebellar** 208 **health and PC survival**

209 To determine whether enhanced Wnt- $\beta$ -catenin signaling in PCs of SCA1 animals directly leads  
210 to neurodegeneration or is secondary to disease progression, we utilized multiple genetic  
211 approaches to conditionally suppress or activate Wnt- $\beta$ -catenin signaling in a cell-type specific  
212 manner in WT and SCA1 mice (Figures 4, 5). We first assessed whether inhibition of Wnt- $\beta$ -  
213 catenin signaling in PCs was able to rescue pathological deficits in SCA1 through conditional  
214 deletion of *Ctnnb1*, the gene encoding  $\beta$ -catenin, specifically in PCs (*Ctnnb1* PC cKO; *Ctnnb1*<sup>fl/fl</sup>;  
215 *Pcp2-cre* mice) of both WT and SCA1 Tg [63Q] animals (Figure 4A). Immunostaining confirmed  
216 successful removal of  $\beta$ -catenin in PCs of *Ctnnb1* PC cKO mice, with surrounding cells still  
217 maintaining  $\beta$ -catenin expression (Figure 4B). Decreased levels of  $\beta$ -catenin protein were also  
218 confirmed in whole cerebellar extracts of *Ctnnb1* PC cKO mice (Figure 4C). Silencing Wnt- $\beta$ -  
219 catenin signaling on a WT background did not significantly impact PC health during adulthood  
220 (Figure 4, Figure S2). As expected, molecular layer thickness was reduced in SCA1 Tg [63Q]  
221 mice; however, this was not rescued by inhibition of Wnt- $\beta$ -catenin signaling in *Ctnnb1* PC cKO;  
222 SCA1 Tg [63Q] mice at 12, 20, or 30 weeks compared to littermate controls (Figure 4D,E).  
223 Additionally, there were no significant changes in climbing fiber innervation between *Ctnnb1* PC  
224 cKO; SCA1 Tg [63Q] and SCA1 Tg [63Q] mice at 12 or 20 weeks (Figure 4F,G). To confirm these  
225 results were not due to the reduced polyQ length or background, we also analyzed molecular  
226 layer thickness and climbing fiber innervation in an independent cohort of SCA1 transgenic  
227 animals overexpressing polyQ-expanded ataxin-1 with 82 repeats in PCs (SCA1 Tg [82Q])<sup>33</sup>.  
228 Similar to SCA1 Tg [63Q] mice, conditional deletion of *Ctnnb1* in PCs of SCA1 Tg [82Q] animals  
229 did not rescue molecular layer thickness or climbing fiber innervation deficits in mice analyzed at  
230 21 weeks of age (Figure S2). Furthermore, silencing of Wnt- $\beta$ -catenin signaling in PCs was not  
231 sufficient to decrease astrogliosis and microgliosis in SCA1 Tg [63Q] mice at 20 weeks, as shown  
232 by *Gfap* and *Iba1* staining of astrocytes and microglia, respectively (Figure 4H-K). These data  
233 demonstrate that inhibition of Wnt- $\beta$ -catenin signaling in PCs specifically was not sufficient to  
234 prevent pathological deficits observed in transgenic SCA1 mice.

235

236 We next sought to determine whether activation of Wnt- $\beta$ -catenin signaling in PCs of WT mice  
237 alone was sufficient to induce SCA1-like phenotypes. To activate Wnt- $\beta$ -catenin signaling in PCs,  
238 we generated *Apc* PC cKO (*Apc<sup>fl/fl</sup>; Pcp2-cre*) mice in which the *Apc* gene, encoding a key  
239 component of the inhibitory destruction complex, was specifically deleted in PCs (Figure 5A). We  
240 confirmed elevated  $\beta$ -catenin levels in the cerebellum of *Apc* PC cKO mice by immunostaining  
241 (Figure 5B). We observed no significant changes in PC number (Figure 5C,D), molecular layer  
242 thickness (Figure 5E,F), or climbing fiber innervation (Figure 5G,H) in 1-year-old *Apc* PC cKO  
243 mice compared to controls, demonstrating that activating Wnt- $\beta$ -catenin signaling specifically in  
244 PCs alone is not sufficient to induce SCA1-like pathology. Together, these data suggest that  
245 elevated Wnt- $\beta$ -catenin signaling in PCs observed in SCA1 does not have a profound impact on  
246 cerebellar health or disease progression.

### 247 **Activation of Wnt- $\beta$ -catenin signaling in BG induces BG mislocalization and gliosis**

248 As described earlier, we observed enhanced Wnt- $\beta$ -catenin signaling not only in PCs, but in  
249 multiple cerebellar cell types in SCA1 KI and SCA1 Tg [63Q] mice (Figures 1D-H, 3E-H). Because  
250 enhanced Wnt- $\beta$ -catenin signaling in PCs alone was not sufficient to drive SCA1-like phenotypes  
251 (Figure 5), and genetically reducing Wnt signaling in PCs was not able to rescue SCA1  
252 phenotypes (Figures 4, S2), we next investigated the impact of elevated Wnt- $\beta$ -catenin signaling  
253 in other cell types of the cerebellum. We were particularly interested in understanding the impact  
254 of Wnt- $\beta$ -catenin signaling in BG, a specialized unipolar astrocyte population exclusive to the  
255 cerebellum, for several reasons. First, BG closely associate with PCs and aid in PC synapse  
256 function and maintenance in adulthood through glutamate recycling and synaptic finetuning<sup>34, 35</sup>.  
257 Second, BG-specific expression of polyQ-expanded ataxin-7, the disease-causing protein for  
258 SCA7, impairs glutamate transport via the reduction of GLAST, which is associated with non-cell  
259 autonomous PC loss<sup>36</sup>. Interestingly, BG in a SCA1 mouse model similarly display a reduction of  
260 GLAST<sup>37</sup>, suggesting dysfunction of BG may contribute to eventual PC loss seen at late stages  
261 in SCA1. Finally, previous studies have shown that Wnt- $\beta$ -catenin signaling activation in BG  
262 through *Apc* deletion is sufficient to cause neuronal loss in adult mice and cerebellar degeneration  
263 in a non-cell autonomous manner<sup>22</sup>.

264  
265  
266 First, to confirm that polyQ-expanded mutant ataxin-1 expression in PCs can lead to non-cell  
267 autonomous Wnt- $\beta$ -catenin signaling activation in other cell types, we analyzed Wnt reporter  
268 activity in BG of SCA1 Tg [63Q] reporter animals at 12 weeks of age (Figure 6A-D). As was the  
269 case with PCs, Wnt reporter activity was significantly increased in Sox9-positive BG in the SCA1  
270 Tg [63Q] mouse cerebellum (Figure 6A-D). This confirmed that, in addition to cell autonomous  
271 effects, expression of polyQ-expanded ataxin-1 in PCs leads to the enhanced activation of Wnt-  
272  $\beta$ -catenin signaling in local cell types of the SCA1 cerebellum through indirect mechanisms.

273  
274 We next examined the impact of enhanced Wnt- $\beta$ -catenin signaling activation in BG. Activation  
275 of Wnt- $\beta$ -catenin signaling in astrocytes (AS) and BG populations through conditional deletion of  
276 *Apc* in *Gfap*-positive cells (*Apc* AS cKO; *Apc<sup>fl/fl</sup>; mGFAP-cre*, Figure S3A) was sufficient to  
277 increase  $\beta$ -catenin levels and induce severe astrogliosis (Figure S3B,C) and a reduction in body  
278 weight in *Apc* AS cKO mice compared to controls (Figure S3D), similar to what is observed in  
279 SCA1 mice<sup>38</sup>. Furthermore, BG cell bodies were aberrantly mislocalized from the PC layer (PCL)  
280 to the molecular layer (ML) in 4-week-old *Apc* AS cKO mice (Figure S3E-I), consistent with  
281 previous studies in which Wnt- $\beta$ -catenin signaling was activated in BG<sup>22</sup>.

282  
283 Because Wnt- $\beta$ -catenin signaling is activated in BG of SCA1 mice (Figure 6A-D) and genetic  
284 activation of Wnt- $\beta$ -catenin signaling in BG is sufficient to induce BG mislocalization during  
285 development (Figure S3)<sup>22</sup>, we next wanted to determine whether similar cellular phenotypes  
286 occurred in SCA1 mice, in which Wnt- $\beta$ -catenin activation occurs in BG weeks after the cerebellar

287 cytoarchitecture is established. To this end, we performed immunohistochemical staining for PCs  
288 (Calb1<sup>+</sup> cells) and BG (Sox9<sup>+</sup> cells) and quantified the number of BG in the PCL and ML (Figures  
289 6E-J, S4). Under physiological conditions, the majority of BG are expected to closely localize to  
290 the cell bodies of PCs in the PCL as a monolayer, which was observed in WT animals (Figure  
291 6E-J). Similar to the *Apc* AS cKO mice (Figure S3E-I), we observed a significant increase in the  
292 number of heterotopic BG in the ML, as well as significant increases in the ratio of BG cells in the  
293 ML/PCL, in 20-week-old SCA1 Tg [82Q] mice (Figure 6E-G) and 30-week-old SCA1 KI mice  
294 (Figure 6H-J). Interestingly, no significant differences were detected at 12 weeks in SCA1 KI mice  
295 (Figure 6I-J, top row), suggesting BG mislocalization occurs in an age-dependent manner.  
296 Considering the important roles of BG in PC maintenance and synapse function<sup>39-43</sup> and that *Apc*  
297 deletion in BG alone has been shown to be sufficient to induce cerebellar degeneration and PC  
298 loss<sup>22</sup>, these data suggest that non-cell autonomous activation of Wnt- $\beta$ -catenin signaling in BG  
299 in SCA1 results in disrupted BG to PC interactions that may contribute to cerebellar circuit  
300 dysfunction and disease pathogenesis.

## 301 302 **Discussion**

303 The cerebellar cortex circuit is comprised of multiple cell types that intricately interact to produce  
304 a coordinated output to the deep cerebellar nuclei via PCs, a population of neurons unique to the  
305 cerebellum that undergoes degeneration in many SCAs<sup>2, 44</sup>. How individual cell types contribute  
306 to cerebellar dysfunction and PC degeneration in SCAs remains an outstanding question. In this  
307 study, we found that ataxin-1, the protein mutated in SCA1, positively regulates Wnt- $\beta$ -catenin  
308 signaling in a polyQ-dependent manner and that canonical Wnt- $\beta$ -catenin signaling is activated  
309 in several SCA1 mouse models in an age-dependent manner in multiple cerebellar cell types,  
310 including PCs and BG. To determine the impact of this increased signaling activity in different cell  
311 types, we used cell-type specific mouse models to activate or inhibit Wnt- $\beta$ -catenin signaling in  
312 PCs and BG and found that the impact of Wnt- $\beta$ -catenin signaling in the adult cerebellum was  
313 greater in BG rather than PCs, highlighting the importance of glia in SCA1 pathology and disease  
314 progression.

315  
316 We also provide a novel mechanism through which ataxin-1 positively regulates Wnt- $\beta$ -catenin  
317 signaling activity. We found that ataxin-1 enhances Wnt- $\beta$ -catenin signaling activity at multiple  
318 levels of the pathway, and that this is dependent on the presence of pathogenic features of ataxin-  
319 1, including polyQ expansion, serine 776-phosphorylation, and nuclear localization. This provides  
320 a cell autonomous mechanism for the enhanced activation of Wnt- $\beta$ -catenin signaling in SCA1  
321 PCs and presumably in other cell types expressing ataxin-1, potentially through direct interaction  
322 with TCF/LEF family members. Our studies also provide a potential non-cell autonomous  
323 mechanism in which elevated expression of Wnt ligands in any given cell type could activate Wnt-  
324  $\beta$ -catenin signaling in surrounding cell types. Enhanced Wnt ligand secretion may also explain  
325 the dysregulation of genes associated with planar cell polarity (PCP) signaling, a noncanonical  
326 Wnt signaling pathway, observed in SCA1 in previous studies<sup>8</sup>. Although expression of mutant  
327 ataxin-1 in the cerebellum is primarily limited to PCs in the transgenic animal models used here,  
328 the cellular source of enhanced Wnt ligand production is unclear. While it is possible that PCs  
329 expressing polyQ-expanded ataxin-1 may cell autonomously increase Wnt ligand production, it is  
330 also possible that PC dysfunction may non-cell autonomously stimulate other local cell types of  
331 the cerebellar cortex to increase production of Wnt ligands. Furthermore, although increased  
332 secretion of Wnt ligands can contribute to local Wnt activation in adjacent cell types, it is possible  
333 that non-cell autonomous Wnt activity can also be influenced by altered inflammatory states of  
334 the various glial populations of the cerebellum, in which changes in intracellular signaling  
335 pathways that reciprocally regulate Wnt- $\beta$ -catenin signaling, such as NF- $\kappa$ B, have been  
336 reported<sup>38, 45, 46</sup>. However, the degree to which activation of BG contributes to enhanced Wnt  
337 activity in SCA1 independent of extracellular Wnt ligands, remains to be determined.

338  
339 We observed enhanced Wnt- $\beta$ -catenin signaling in multiple cell types, besides PCs and BG, in  
340 our SCA1 mouse models in an age-dependent manner compared to controls. Future studies to  
341 investigate which other cell types exhibit enhanced Wnt- $\beta$ -catenin signaling in SCA1 mice are  
342 needed. Furthermore, whether this activation of Wnt- $\beta$ -catenin signaling in those cell types is  
343 protective, toxic, compensatory, or secondary to SCA1 disease progression requires further  
344 investigation. Interestingly, Wnt signaling has been implicated in other neurodegenerative  
345 diseases, including Alzheimer's disease (AD)<sup>47-51</sup>, amyotrophic lateral sclerosis (ALS)<sup>52, 53</sup>, and  
346 Huntington's Disease (HD)<sup>54</sup>. Previous studies of the impact of Wnt- $\beta$ -catenin signaling in AD  
347 suggest enhanced signaling may be protective against the toxicity of A $\beta$  peptides, including  
348 synapse loss<sup>55</sup>. In contrast, enhanced  $\beta$ -catenin levels are thought to be toxic in HD<sup>54</sup>. Our studies  
349 here in SCA1 suggest that activation of Wnt- $\beta$ -catenin signaling impacts unique cell populations  
350 in the cerebellum differently, and highlight the importance of examining signaling pathways in the  
351 specific cellular contexts in which they may be affected. Our data indicate that while activation of  
352 Wnt- $\beta$ -catenin in PCs does not significantly contribute to SCA1 phenotypes, activation of Wnt- $\beta$ -  
353 catenin signaling in BG is detrimental and sufficient to cause gliosis and BG mislocalization in  
354 *Apc* AS cKO mice. The exact cellular mechanisms through which BG impact PC health and SCA1  
355 pathology are still unclear; however, these findings underscore the complex cell-cell interactions  
356 underlying SCA1 pathogenesis and bring attention to the role of BG in PC survival and in SCA1  
357 disease progression.

## 358 359 **Materials and Methods**

### 360 361 **Animal husbandry**

362 All animal care procedures were approved by the Yale University Institutional Animal Care and  
363 Use Committee. Mice were kept in a 12 hour light/dark cycle with standard chow and *ad libitum*  
364 access to water. A combination of males and females were used for all experiments. Three mouse  
365 models of SCA1 were utilized; a SCA1 knock-in (SCA1 KI; *Atn1*<sup>154Q/+</sup>)<sup>26</sup> strain which expresses  
366 mutant ataxin-1 with 154 glutamine repeats under its endogenous promoter, a SCA1 transgenic  
367 (SCA1 Tg [82Q]; *Pcp2-ATXN1*<sup>82Q/+</sup>)<sup>33</sup> line in which mutant ataxin-1 with 82 glutamine repeats is  
368 overexpressed under the PC-specific *Pcp2* promoter, and a SCA1 transgenic (SCA1 Tg [63Q];  
369 *Pcp2-ATXN1*<sup>63Q/+</sup>) line, in which the polyQ tract length was reduced to 63 glutamine repeats due  
370 to a germline contraction event. These lines were crossed with a Wnt- $\beta$ -catenin reporter line  
371 (TCF/Lef:H2B-GFP)<sup>27</sup>, in which Wnt- $\beta$ -catenin activity drives GFP expression in cells.  
372 Additionally, the SCA1 Tg [63Q] and SCA1 Tg [82Q] lines were crossed with *Cttnb1* PC cKO  
373 (*Cttnb1*<sup>fl/fl</sup>; *Pcp2-cre*), *Apc* PC cKO (*Apc*<sup>fl/fl</sup>; *Pcp2-cre*), and *Apc* AS cKO (*Apc*<sup>fl/fl</sup>; *mGFAP-cre*)  
374 lines, in which Wnt- $\beta$ -catenin signaling is activated or inhibited in PC (under the PC-specific *Pcp2*  
375 promoter) or astrocyte (under the astrocyte-specific *mGFAP* promoter) populations specifically.  
376 *Cttnb1*<sup>fl/fl</sup> (Jackson Laboratory Stock No. 004152), TCF/Lef:H2B-GFP (Jackson Laboratory Stock  
377 No. 013752), *mGFAP-cre* (Jackson Laboratory Stock No. 012886), and *Apc*<sup>fl/fl</sup> (EMMA mouse  
378 repository, Stock No. EM:05566) strains were purchased commercially. SCA1 Tg [63Q] mice were  
379 originally maintained on a FVB background and backcrossed onto C57BL/6J for three generations  
380 before analyses. All other mice and littermates were maintained on a C57BL/6J background.

### 381 382 **Protein extraction and western blot analysis**

383 Mouse cerebellar tissue was homogenized in Triple lysis buffer (0.5% NP-40, 0.5% Triton X-100,  
384 0.1% SDS, 20 mM Tris-HCl (pH 8.0), 180 mM NaCl, 1 mM EDTA and Roche complete protease  
385 inhibitor cocktail and PhosStop protease inhibitors) by dounce homogenization on ice. Samples  
386 were then sonicated to ensure breakdown of protein aggregates before rotation at 4°C for 10  
387 minutes and centrifugation for 10 minutes at 13,000 rpm at 4°C. Total protein concentration of the  
388 supernatant was quantified using a BCA assay (ThermoFisher 23225) and equal protein amounts



389 were boiled at 95°C for 10 minutes prior to being run on a gel (BioRad) at 120V. Proteins from  
390 gels were transferred for one hour at 100V at 4°C onto 0.45µm nitrocellulose membranes.  
391 Membranes were washed with TBST (Tris-buffered saline, 0.1% Tween-20) three times for 10  
392 minutes each, followed by one hour of blocking in 5% non-fat dry milk in TBST at room  
393 temperature. Membranes were then incubated with primary antibody in 5% non-fat dry milk in  
394 TBST at 4°C overnight. The following day, membranes were washed with TBST three times for  
395 10 minutes each, followed by incubation in either sheep anti-mouse or donkey anti-rabbit IgG-  
396 conjugated with horseradish peroxidase (HRP) (Millipore Sigma, GENA931, GENA934, 1:4,000)  
397 in TBST at room temperature for two hours. Membranes were then washed with TBST three times  
398 for 10 minutes and developed using SuperSignal West Pico Plus Chemiluminescent substrate  
399 (Pierce, Cat. 34580) and visualized using a KwikQuant Imager (Kindle Biosciences). Images were  
400 quantified using ImageJ. The following primary antibodies were used: Mouse anti-Gapdh (Sigma  
401 G8795, 1:10,000), mouse anti-β-catenin (BD 610154, 1:20,000), mouse anti-active β-catenin  
402 (Millipore 06-665 1:500), rabbit anti-ataxin-1 (11750, 1:1,000), mouse anti-T7 (Novagen 69522,  
403 1:10,000), rabbit anti-HA (Abcam ab9110, 1:5,000), mouse anti-c-Myc (Sigma M5546 clone 9e10,  
404 1:1,000), and rabbit anti-GST (Sigma G7781, 1:3,000).

#### 405 **RNA extraction and RT-qPCR**

406 RNA was extracted from frozen mouse cerebellar tissue using the Qiagen RNeasy Mini Kit,  
407 following the manufacturer's instructions. cDNA was synthesized using oligo-dT primers and  
408 iScript cDNA synthesis kit (BioRad, 1708891). Reverse transcription-quantitative Polymerase  
409 Chain Reaction (RT-qPCR) was performed using TaqMan probes with iTaq Universal Probe  
410 Supermix on a C1000 Thermal Cycler (BioRad). The following TaqMan (Applied Biosystems)  
411 probes were used: *Gapdh* (4352661, Mm99999915\_g1), *Actb* (4352933E, Mm00607939\_s1),  
412 *Hprt* (4331182, Mm03024075\_m1), *Ccnd1* (4331182, Mm00432359\_m1), *Myc* (4331182,  
413 Mm00487804\_m1), *Axin2* (4331182, Mm00443610\_m1). Custom TaqMan array plates  
414 (ThermoFisher, 4413261) were used for the Wnt ligand screen, with the following TaqMan probes:  
415 *Actb* (Mm00607939\_s1), *Gapdh* (Mm99999915\_g1), *Hprt* (Mm00446968\_m1), *Wnt1*  
416 (Mm01300555\_g1), *Wnt2* (Mm00470018\_m1), *Wnt2b* (Mm00437330\_m1), *Wnt3*  
417 (Mm00437336\_m1), *Wnt4* (Mm01194003\_m1), *Wnt5a* (Mm00437347\_m1), *Wnt6*  
418 (Mm00437353\_m1), *Wnt7a* (Mm00437356\_m1), *Wnt8b* (Mm00442108\_g1), *Wnt10a*  
419 (Mm00437325\_m1), *Wnt10b* (Mm00442104\_m1), *Wnt11* (Mm00437327\_g1). All samples were  
420 loaded in triplicate. Target gene expression was normalized to housekeeping genes (*Actb*,  
421 *Gapdh*, and *Hprt*) using BioRad CFX manager software and plotted relative to mean expression  
422 of WT littermate controls.

#### 423 **Immunofluorescence staining**

424 Mice were anesthetized prior to intracardial perfusion with phosphate buffered saline (PBS) and  
425 4% paraformaldehyde (PFA). Brains were post-fixed overnight in 4% PFA before incubation in  
426 20% and 30% sucrose in PBS. Samples were frozen in OCT compound (VWR, 4538) and sliced  
427 into 30µm sections on a cryostat (Leica). Free-floating sections were washed in PBS and PBS  
428 with 0.1% Triton-X before incubation in 5% normal goat serum (Jackson Labs, 005-000-121) at  
429 room temperature. Upon usage, antigen retrieval with 10mM citric acid for 30 minutes was used  
430 before wash and incubation in primary antibody. Primary antibody incubation was carried out at  
431 4°C overnight with the following antibodies: mouse anti-Calbindin-D-28K (Sigma, C9848, 1:1000),  
432 rabbit anti-vGlut2 (Synaptic Systems, 135402, 1:500), rabbit anti-β-Catenin (Sigma,  
433 AV14001,1:1000), mouse anti-β-catenin (BD Transduction Laboratories, 610154, 1:1000),  
434 chicken anti-Gfap (Abcam, ab4674, 1:1000), rabbit anti-Iba1 (Wako, 019-19741, 1:500), rabbit  
435 anti-Sox9 (1:500), and rabbit anti-GFP (Abcam, ab290, 1:4000). Sections were washed in PBS  
436 with 0.1% Triton-X before incubation in secondary antibody (Invitrogen AlexaFluor, 1:500) then  
437 washed and mounted onto slides and coverslipped with Vectashield mounting media and DAPI  
438

439 (Vector Laboratories, H-1500). Fluorescent images were acquired on a Zeiss LSM800 or LSM880  
440 confocal microscope, using the same microscope and settings across similar experiments.  
441 Between 3-6 brain sections were imaged and quantified for each mouse.

442

#### 443 **Fluorescent image quantification**

444 ImageJ (National Institutes of Health) was used for all image processing and quantification. For  
445 fluorescent intensity quantification, image z-stacks were flattened to maximum intensity z-  
446 projection, converted to 8-bit images, and thresholded using identical parameters across all  
447 images. ROI manager was used to measure equal areas across images. For GFP fluorescent  
448 intensity quantification in PCs or BG, calbindin (for PCs) or Sox9 (for BG) images were  
449 thresholded, and overlaid onto the GFP images. The mean gray intensity value was recorded. To  
450 measure the molecular layer thickness, the lengths of the PC dendrites were measured at six  
451 locations in the image, from the tip of the PC soma until the end of the molecular layer  
452 approximately 300 $\mu$ m from the tip of the specified cerebellar lobule. For calbindin intensity across  
453 the molecular layer, a similar methodology was employed as previously described<sup>26</sup>. Briefly, the  
454 z-stack was flattened in ImageJ using the average intensity z-projection, and the intensity per  
455 pixel plotted using plot profile. Three PCs approximately 300 $\mu$ m from the tip of the lobule per  
456 section were used for quantification, and the average intensity value for 1 $\mu$ m increments plotted  
457 for each animal. For assessing the innervation of inferior olive climbing fiber vGlut2 puncta along  
458 PC dendrites, a z-stack corresponding to a 5 $\mu$ m depth was flattened in ImageJ using the  
459 maximum intensity z-projection. The length of vGlut2 innervation relative to the length of the  
460 molecular layer was measured at three separate locations along the lobule, similar to the  
461 methodology for assessing calbindin intensity. For assessing Sox9-positive BG distribution,  
462 image z-stacks were flattened to maximum intensity z-projection, converted to 8-bit images, and  
463 thresholded using equal parameters across all images. ROI manager was used to measure equal  
464 areas across images for the PC layer and molecular layer. The watershed function was utilized  
465 to split clumped nuclei, and only BG with nuclei greater than 3 $\mu$ m<sup>2</sup> were analyzed. For all  
466 quantifications, 3-6 images were quantified per mouse, and data was plotted using GraphPad  
467 Prism.

468

#### 469 **Toluidine blue staining and quantification**

470 Perfused brain sections 30 $\mu$ m thick were mounted onto slides, outlined with a Pap pen, and  
471 washed with PBS before incubating in 2% toluidine blue in PBS for approximately 5 minutes.  
472 Sections were monitored under a dissection microscope until PCs were adequately labeled.  
473 Slides were then washed in PBS until residual stain was removed, then allowed to dry before  
474 coverslipping with Permount. Sections were imaged on an Olympus microscope and PC counts  
475 were quantified by a blinded observer in ImageJ. The total number of PCs across a 200 $\mu$ m  
476 distance was quantified.

477

#### 478 **Luciferase reporter assay**

479 HeLa cells were plated at 7.5x10<sup>4</sup> cells per well 24 hours prior to transfection. Cells were  
480 transfected with 10ng TOP or FOP flash, 1ng Renilla, and 100ng of gene of interest. For Wnt3a  
481 conditioned media, 24 hours later media was changed and incubated overnight. Luciferase  
482 activity was measured 48 hours post-transfection (Dual luciferase, Promega).

483

#### 484 **Co-affinity purification**

485 HeLa cells were plated at 0.5-1x10<sup>6</sup> cells per well 24 hours prior to transfection, maintained in a  
486 37°C, 5.5% CO<sub>2</sub> incubator. When 70-80% confluent, cells were transfected with 0.5 $\mu$ g of gene of  
487 interest, 1 $\mu$ g of GST-ATXN1 plasmid, 4.5 $\mu$ g polyethylenimine (PEI), and Opti-MEM. 48 hours  
488 post-transfection, cells were transferred into 1 mL PBS and centrifuged for one minute at  
489 13,000rpm. The cells were resuspended in Triple lysis buffer, and rotated at 4°C for 30min to lyse

490 cells. Cells were centrifuged for 15 minutes at 13,000rpm at 4°C. Supernatant was either kept for  
491 crude extract, or transferred to 20µl of washed glutathione-sepharose 4B beads (Millipore Sigma,  
492 GE17-0756-01) for affinity purification. Affinity purification samples were rotated overnight at 4°C  
493 and washed 5 times in lysis buffer. All samples were diluted in 4x buffer with BME, and boiled for  
494 10 minutes at 95°C prior to loading gel. Western blots were run as described above. The following  
495 primary antibodies were used: T7 (Novagen 69522, 1:10,000), HA (Abcam ab9110, 1:5,000), c-  
496 Myc (Sigma M5546 clone 9e10, 1:1,000), β-catenin (BD 610154, 1:20,000), and GST (Sigma  
497 G7781, 1:3,000). To visualize GST signal, membranes were stripped with 10mM sodium azide in  
498 TBST for one hour, washed three times with TBST for 10 minutes each, and blocked with 5%  
499 non-fat milk in TBST for 1 hour, prior to incubation with GST primary antibody overnight at 4°C.  
500 Subsequent steps were performed as described above.

## 501 502 **Statistical analysis**

503 All statistical analyses were performed in GraphPad Prism. Data are shown as mean ± SEM. To  
504 determine statistical significance, either two-tailed unpaired Student's *t* tests (when comparing  
505 two experimental groups) or one-way analysis of variance (ANOVA) with Tukey's post-hoc  
506 analysis (when comparing more than two experimental groups) were performed, with a  
507 significance cutoff of  $P < 0.05$ .

## 508 509 **Acknowledgements**

510 We thank all members from the Lim laboratory for technical support, thoughtful discussion,  
511 comments and critiques for this project. This work was supported by National Institute of Health  
512 grants NS083706 (J.L.), NS088321 (J.L.), MH119803 (J.L.), AG066447 (J.L.), and T32 NS041228  
513 (K.L., L.T.).

## 514 515 **References**

- 516 1. Orr, H.T., *et al.* Expansion of an unstable trinucleotide CAG repeat in spinocerebellar  
517 ataxia type 1. *Nat Genet* **4**, 221-226 (1993).
- 518 2. Orr, H.T. & Zoghbi, H.Y. SCA1 molecular genetics: a history of a 13 year collaboration  
519 against glutamines. *Hum Mol Genet* **10**, 2307-2311 (2001).
- 520 3. Driessen, T.M., Lee, P.J. & Lim, J. Molecular pathway analysis towards understanding  
521 tissue vulnerability in spinocerebellar ataxia type 1. *Elife* **7** (2018).
- 522 4. Serra, H.G., *et al.* RORalpha-mediated Purkinje cell development determines disease  
523 severity in adult SCA1 mice. *Cell* **127**, 697-708 (2006).
- 524 5. Edamakanti, C.R., Do, J., Didonna, A., Martina, M. & Opal, P. Mutant ataxin1 disrupts  
525 cerebellar development in spinocerebellar ataxia type 1. *J Clin Invest* **128**, 2252-2265 (2018).
- 526 6. Lin, X., Antalffy, B., Kang, D., Orr, H.T. & Zoghbi, H.Y. Polyglutamine expansion down-  
527 regulates specific neuronal genes before pathologic changes in SCA1. *Nat Neurosci* **3**, 157-163  
528 (2000).
- 529 7. Ruegsegger, C., *et al.* Impaired mTORC1-Dependent Expression of Homer-3 Influences  
530 SCA1 Pathophysiology. *Neuron* **89**, 129-146 (2016).
- 531 8. Ingram, M., *et al.* Cerebellar Transcriptome Profiles of ATXN1 Transgenic Mice Reveal  
532 SCA1 Disease Progression and Protection Pathways. *Neuron* **89**, 1194-1207 (2016).

- 533 9. Lein E.S., *et al.* Genome-wide atlas of gene expression in the adult mouse brain. *Nature*  
534 **445**, 168-176 (2007).
- 535 10. Servadio, A., *et al.* Expression analysis of the ataxin-1 protein in tissues from normal and  
536 spinocerebellar ataxia type 1 individuals. *Nat Genet* **10**, 94-98 (1995).
- 537 11. Zhang, Y., *et al.* An RNA-sequencing transcriptome and splicing database of glia, neurons,  
538 and vascular cells of the cerebral cortex. *J Neurosci* **34**, 11929-11947 (2014).
- 539 12. Thomas, K.R., Musci, T.S., Neumann, P.E. & Capecchi, M.R. Swaying is a mutant allele  
540 of the proto-oncogene Wnt-1. *Cell* **67**, 969-976 (1991).
- 541 13. Goold, R., *et al.* Down-regulation of the dopamine receptor D2 in mice lacking ataxin 1.  
542 *Hum Mol Genet* **16**, 2122-2134 (2007).
- 543 14. Zeng, L., *et al.* Loss of the Spinocerebellar Ataxia type 3 disease protein ATXN3 alters  
544 transcription of multiple signal transduction pathways. *PLoS ONE* **13** (2018).
- 545 15. Komiya, Y. & Habas, R. Wnt signal transduction pathways. *Organogenesis* **4**, 68-75  
546 (2008).
- 547 16. Patapoutian, A. & Reichardt, L.F. Roles of Wnt proteins in neural development and  
548 maintenance. *Curr Opin Neurobiol* **10**, 392-399 (2000).
- 549 17. Brault, V., *et al.* Inactivation of the beta-catenin gene by Wnt1-Cre-mediated deletion  
550 results in dramatic brain malformation and failure of craniofacial development. *Development* **128**,  
551 1253-1264 (2001).
- 552 18. Selvadurai, H.J. & Mason, J.O. Activation of Wnt/beta-catenin signalling affects  
553 differentiation of cells arising from the cerebellar ventricular zone. *PLoS One* **7**, e42572 (2012).
- 554 19. Hall, A.C., Lucas, F.R. & Salinas, P.C. Axonal remodeling and synaptic differentiation in  
555 the cerebellum is regulated by WNT-7a signaling. *Cell* **100**, 525-535 (2000).
- 556 20. Pei, Y., *et al.* WNT signaling increases proliferation and impairs differentiation of stem cells  
557 in the developing cerebellum. *Development* **139**, 1724-1733 (2012).
- 558 21. Lorenz, A., *et al.* Severe alterations of cerebellar cortical development after constitutive  
559 activation of Wnt signaling in granule neuron precursors. *Mol Cell Biol* **31**, 3326-3338 (2011).
- 560 22. Wang, X., Imura, T., Sofroniew, M.V. & Fushiki, S. Loss of adenomatous polyposis coli in  
561 Bergmann glia disrupts their unique architecture and leads to cell nonautonomous  
562 neurodegeneration of cerebellar Purkinje neurons. *Glia* **59**, 857-868 (2011).
- 563 23. Schuller, U. & Rowitch, D.H. Beta-catenin function is required for cerebellar  
564 morphogenesis. *Brain Res* **1140**, 161-169 (2007).
- 565 24. Brakeman, J.S., Gu, S.H., Wang, X.B., Dolin, G. & Baraban, J.M. Neuronal localization of  
566 the Adenomatous polyposis coli tumor suppressor protein. *Neuroscience* **91**, 661-672 (1999).
- 567 25. Coyle-Rink, J., Valle, D., L, S. & T, K. Developmental expression of Wnt signaling factors  
568 in mouse brain. *Cancer Biol Ther* **1**, 640-645 (2002).



- 569 26. Watase, K., *et al.* A long CAG repeat in the mouse Sca1 locus replicates SCA1 features  
570 and reveals the impact of protein solubility on selective neurodegeneration. *Neuron* **34**, 905-919  
571 (2002).
- 572 27. Ferrer-Vaquer, A., *et al.* A sensitive and bright single-cell resolution live imaging reporter  
573 of Wnt/B-catenin signaling in the mouse. *BMC Dev Biol* **10**, 121-121 (2010).
- 574 28. Friedrich, J., *et al.* Antisense oligonucleotide-mediated ataxin-1 reduction prolongs  
575 survival in SCA1 mice and reveals disease-associated transcriptome profiles. *JCI Insight* **3**  
576 (2018).
- 577 29. Veeman, M.T., Slusarski, D.C., Kaykas, A., Louie, S.H. & Moon, R.T. Zebrafish prickles, a  
578 modulator of noncanonical Wnt/Fz signaling, regulates gastrulation movements. *Curr Biol* **13**,  
579 680-685 (2003).
- 580 30. MacDonald, B.T., Tamai, K. & He, X. Wnt/beta-catenin signaling: components,  
581 mechanisms, and diseases. *Dev Cell* **17**, 9-26 (2009).
- 582 31. Tejwani, L. & Lim, J. Pathogenic mechanisms underlying spinocerebellar ataxia type 1.  
583 *Cell Mol Life Sci* (2020).
- 584 32. Zoghbi, H.Y. & Orr, H.T. Pathogenic mechanisms of a polyglutamine-mediated  
585 neurodegenerative disease, spinocerebellar ataxia type 1. *J Biol Chem* **284**, 7425-7429 (2009).
- 586 33. Burright, E.N., *et al.* SCA1 transgenic mice: a model for neurodegeneration caused by an  
587 expanded CAG trinucleotide repeat. *Cell* **82**, 937-948 (1995).
- 588 34. Grosche, J., *et al.* Microdomains for neuron-glia interaction: parallel fiber signaling to  
589 Bergmann glial cells. *Nat Neurosci* **2**, 139-143 (1999).
- 590 35. Yamada, K., *et al.* Dynamic transformation of Bergmann glial fibers proceeds in correlation  
591 with dendritic outgrowth and synapse formation of cerebellar Purkinje cells. *J Comp Neurol* **418**,  
592 106-120 (2000).
- 593 36. Custer, S.K., *et al.* Bergmann glia expression of polyglutamine-expanded ataxin-7  
594 produces neurodegeneration by impairing glutamate transport. *Nature Neuroscience* **9**, 1302-  
595 1311 (2006).
- 596 37. Cvetanovic, M. Decreased expression of glutamate transporter GLAST in Bergmann glia  
597 is associated with the loss of Purkinje neurons in the spinocerebellar ataxia type 1. *Cerebellum*  
598 **14**, 8-11 (2015).
- 599 38. Cvetanovic, M., Ingram, M., Orr, H. & Opal, P. Early activation of microglia and astrocytes  
600 in mouse models of spinocerebellar ataxia type 1. *Neuroscience* **289**, 289-299 (2015).
- 601 39. Buffo, A. & Rossi, F. Origin, lineage and function of cerebellar glia. 42-63 (2013).
- 602 40. Bellamy, T.C. Interactions between Purkinje neurones and Bergmann glia. *Cerebellum* **5**,  
603 116-126 (2006).

- 604 41. De Zeeuw, C.I. & Hoogland, T.M. Reappraisal of Bergmann glial cells as modulators of  
605 cerebellar circuit function. *Frontiers in Cellular Neuroscience* **9**, 1-8 (2015).
- 606 42. Sasaki, T., *et al.* Application of an optogenetic byway for perturbing neuronal activity via  
607 glial photostimulation. *Proc Natl Acad Sci U S A* **109**, 20720-20725 (2012).
- 608 43. Yamada, K. & Watanabe, M. Cytodifferentiation of Bergmann glia and its relationship with  
609 Purkinje cells. *Anat Sci Int* **77**, 94-108 (2002).
- 610 44. Robinson, K.J., Watchon, M. & Laird, A.S. Aberrant Cerebellar Circuitry in the  
611 Spinocerebellar Ataxias. *Front Neurosci* **14**, 707 (2020).
- 612 45. Kim, J.H., Lukowicz, A., Qu, W., Johnson, A. & Cvetanovic, M. Astroglia contribute to the  
613 pathogenesis of spinocerebellar ataxia Type 1 (SCA1) in a biphasic, stage-of-disease specific  
614 manner. *Glia* **66**, 1972-1987 (2018).
- 615 46. Ma, B. & Hottiger, M.O. Crosstalk between Wnt/beta-Catenin and NF-kappaB Signaling  
616 Pathway during Inflammation. *Front Immunol* **7**, 378 (2016).
- 617 47. Inestrosa, N.C., Varela-Nallar, L., Grabowski, C.P. & Colombres, M. Synaptotoxicity in  
618 Alzheimer's disease: the Wnt signaling pathway as a molecular target. *IUBMB Life* **59**, 316-321  
619 (2007).
- 620 48. Toledo, E.M. & Inestrosa, N.C. Activation of Wnt signaling by lithium and rosiglitazone  
621 reduced spatial memory impairment and neurodegeneration in brains of an  
622 APP<sup>swe</sup>/PSEN1<sup>DeltaE9</sup> mouse model of Alzheimer's disease. *Mol Psychiatry* **15**, 272-285  
623 (2010).
- 624 49. Alvarez, A.R., *et al.* Wnt-3a overcomes beta-amyloid toxicity in rat hippocampal neurons.  
625 *Exp Cell Res* **297**, 186-196 (2004).
- 626 50. da Cruz e Silva, O.A., Henriques, A.G., Domingues, S.C. & da Cruz e Silva, E.F. Wnt  
627 signalling is a relevant pathway contributing to amyloid beta- peptide-mediated neuropathology in  
628 Alzheimer's disease. *CNS Neurol Disord Drug Targets* **9**, 720-726 (2010).
- 629 51. Li, B., *et al.* WNT5A signaling contributes to A $\beta$ -induced neuroinflammation and  
630 neurotoxicity. *PLoS One* **6**, e22920 (2011).
- 631 52. Chen, Y., *et al.* Wnt signaling pathway is involved in the pathogenesis of amyotrophic  
632 lateral sclerosis in adult transgenic mice. *Neurol Res* **34**, 390-399 (2012).
- 633 53. Chen Y, *et al.* Activation of the Wnt/beta-catenin signaling pathway is associated with glial  
634 proliferation in the adult spinal cord of ALS transgenic mice. *Biochem Biophys Res Commun* **420**,  
635 397-403 (2012).
- 636 54. Godin, J.D., Poizat, G., Hickey, M.A., Maschat, F. & Humbert, S. Mutant huntingtin-  
637 impaired degradation of beta-catenin causes neurotoxicity in Huntington's disease. *EMBO J* **29**,  
638 2433-2445 (2010).
- 639 55. Inestrosa, N.C. & Varela-Nallar, L. Wnt signaling in the nervous system and in Alzheimer's  
640 disease. *Journal of Molecular Cell Biology* **6**, 64-74 (2014).

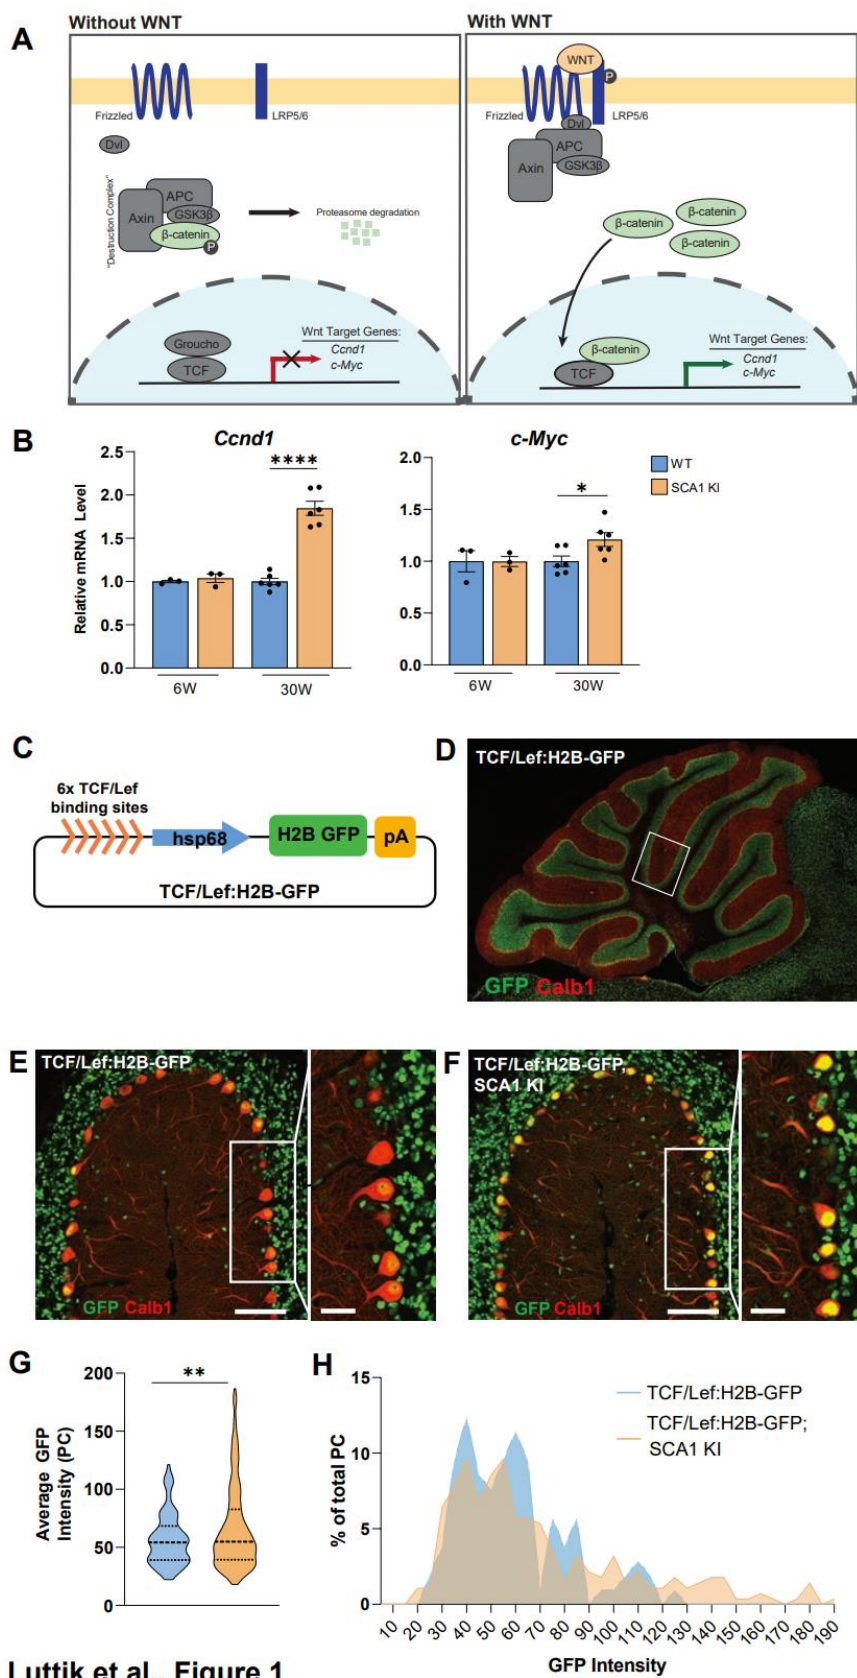

642 **Figure 1. Enhanced activation of Wnt- $\beta$ -catenin signaling in the SCA1 KI mouse**  
643 **cerebellum.**

644 **A**, Overview of Wnt- $\beta$ -catenin signaling pathway. In the absence of Wnt ligands,  $\beta$ -catenin is  
645 degraded by a degradation complex. In the presence of Wnt ligands,  $\beta$ -catenin accumulates and  
646 translocates to the nucleus where it binds with TCF family transcription factors to activate Wnt-  
647 responsive genes, including *Ccnd1*, and *c-Myc*. **B**, RT-qPCR of Wnt- $\beta$ -catenin target gene  
648 expression in SCA1 KI mouse cerebellum at 6 and 30 weeks, normalized to WT littermate controls  
649 (6 weeks, n=3 animals per genotype; 30 weeks, n=6 per genotype). **C**, Schematics of Wnt- $\beta$ -  
650 catenin signaling reporter (TCF/Lef:H2B-GFP). **D**, Representative image of Wnt- $\beta$ -catenin  
651 signaling reporter (TCF/Lef:H2B-GFP) cerebellum, stained with GFP (Wnt- $\beta$ -catenin signaling  
652 activity) and Calbindin (Calb1, PCs). **E,F**, Representative images of 19 week TCF/Lef:H2B-GFP  
653 **(E)** and TCF/Lef:H2B-GFP; SCA1 KI **(F)** mouse cerebellar lobule 5, stained with GFP and Calb1,  
654 scale bar 100  $\mu$ m, inset 25  $\mu$ m. **G,H**, Quantification of intensity of Wnt- $\beta$ -catenin signaling activity  
655 in PCs, as average GFP intensity in all Calb1<sup>+</sup> cells **(G)**, and as percentage of total PCs counted  
656 binned by GFP intensity **(H)** (TCF/Lef:H2B-GFP; SCA1 KI, n=2; TCF/Lef:H2B-GFP, n=1).  
657 \* $P$ <0.05, \*\* $P$ <0.01, \*\*\*\* $P$ <0.0001, by student's  $t$ -test.  
658



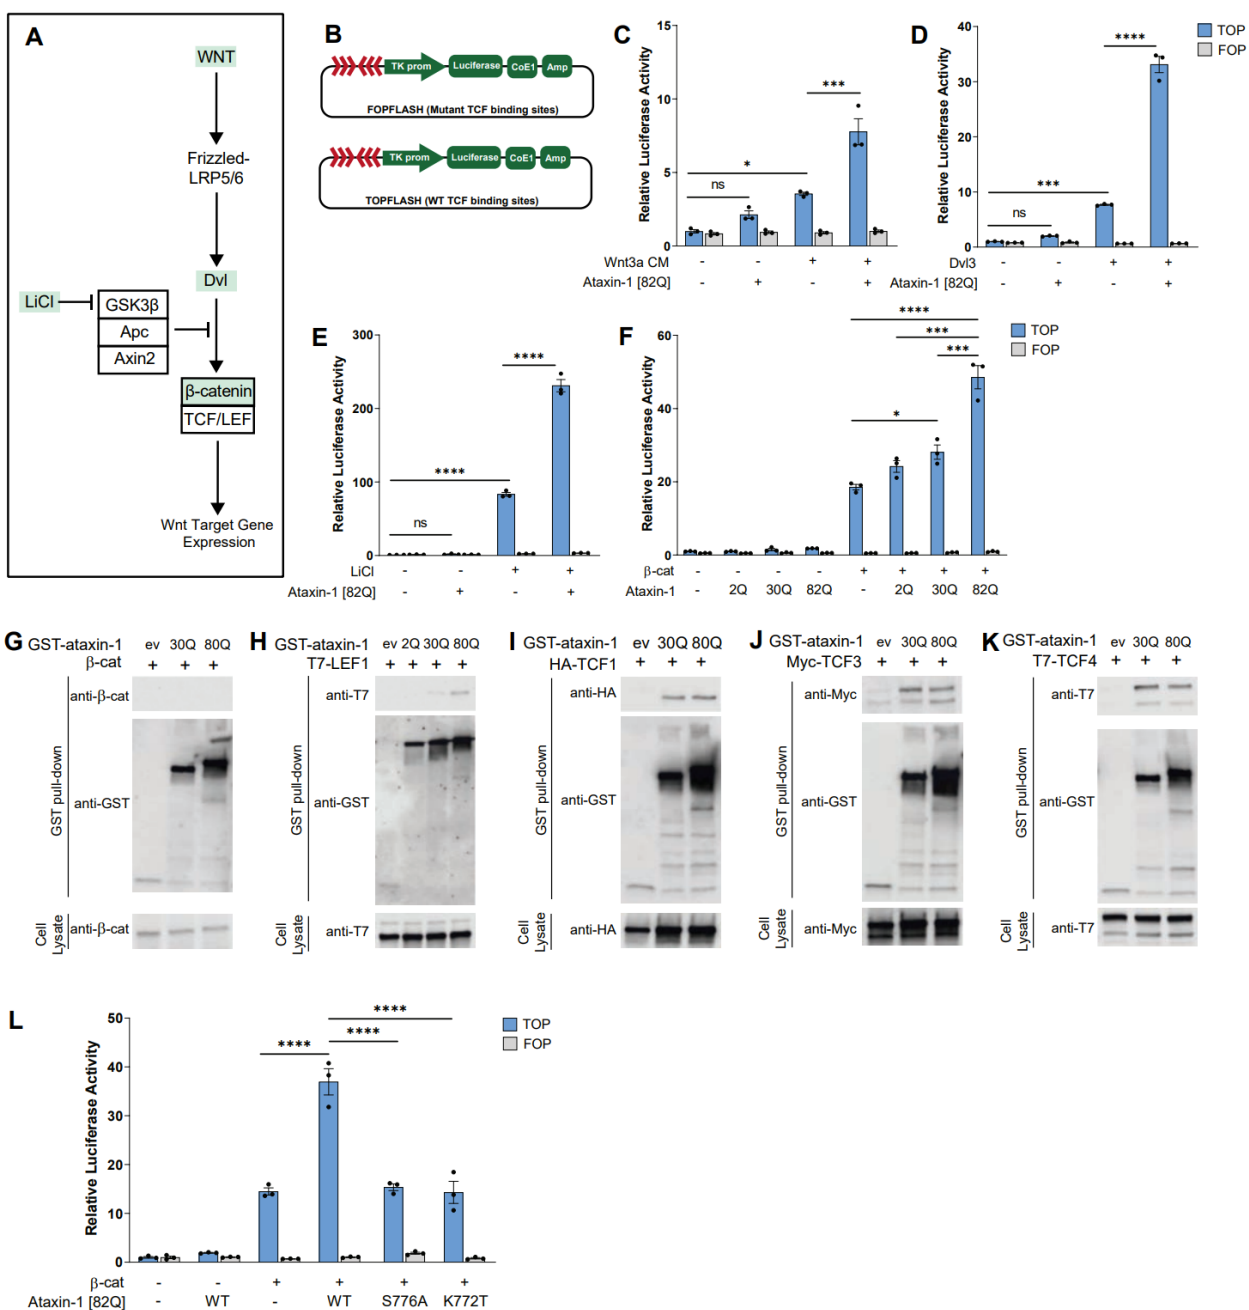

Luttik et al., Figure 2

659  
660  
661  
662  
663  
664  
665  
666  
667  
668

**Figure 2. Ataxin-1 activates Wnt- $\beta$ -catenin signaling transcription by binding to TCF family transcription factors.**

**A**, Wnt- $\beta$ -catenin signaling cascade schematic, with components of the pathway targeted in Luciferase assay (**C-F,L**) highlighted in green. **B**, Schematic of TOPFlash, a  $\beta$ -catenin-responsive luciferase reporter, and FOPFlash, negative control, constructs, in which TCF binding sites trigger luciferase activity. **C-F**, Quantification of luciferase activity (TOPFlash) upon co-transfection of HeLa cells with ataxin-1 [82Q] with Wnt- $\beta$ -catenin signaling activators, including (**C**) Wnt3A-conditioned media (Wnt3a CM), (**D**) Dishevelled 3 (Dvl3), (**E**) LiCl treatment, an inhibitor of GSK3 $\beta$

669 (negative regulator of Wnt signaling), and **(F)**  $\beta$ -catenin ( $\beta$ -cat) (n=3 per treatment group). **G-K**,  
670 Co-affinity purification assays of polyQ-expanded ataxin-1 of 30Q and 82Q length and TCF/ $\beta$ -  
671 catenin transcription factors in HeLa cells, including **(G)**  $\beta$ -catenin, **(H)** LEF1, **(I)** TCF1, **(J)** TCF3,  
672 **(K)** TCF4. Top panel shows expression of TCF/ $\beta$ -catenin transcription factors and GST-ataxin-1  
673 after affinity purification on Glutathione-Sepharose 4B beads. Bottom panel shows total cell  
674 lysate. ev = GST-empty vector. **L**, PolyQ-expanded ataxin-1 enhances Wnt- $\beta$ -catenin signaling  
675 while non-pathogenic forms of ataxin-1 do not in Luciferase assay. S776A is phosphorylation-  
676 defective, K772T is nuclear localization-defective (n=3 per treatment group). \*P<0.05, \*\*\*P<0.001,  
677 \*\*\*\*P<0.0001, ns, non-significant, by one-way ANOVA with Tukey's post-hoc analysis.

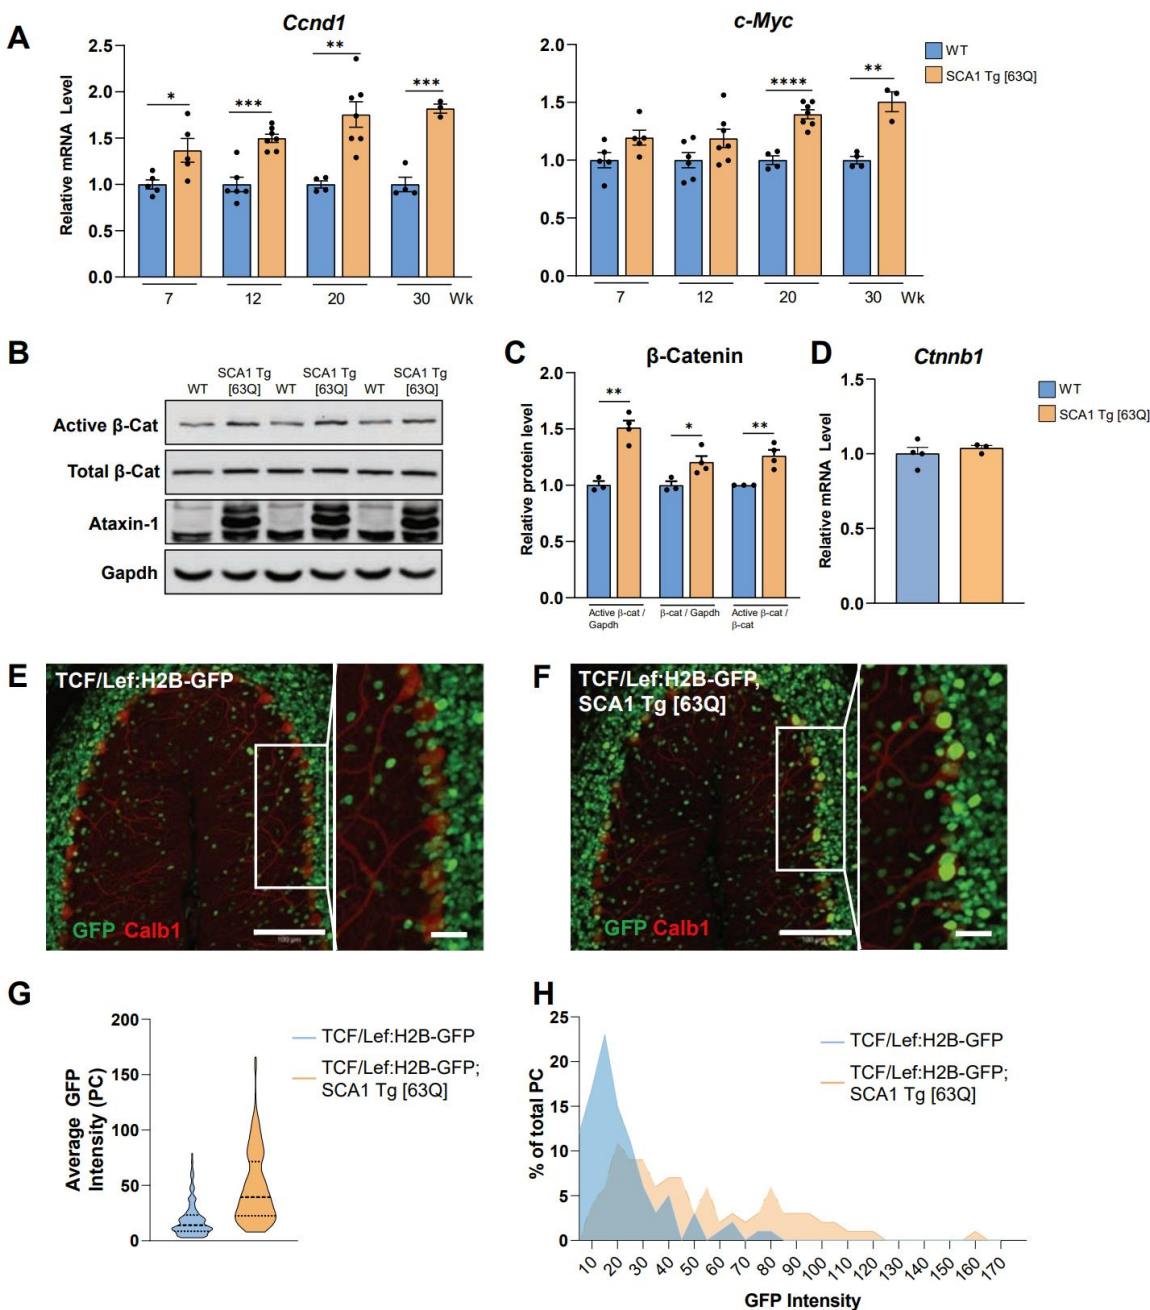

Luttik et al., Figure 3

678  
679

680 **Figure 3. Enhanced activation of Wnt-β-catenin signaling in the SCA1 Tg [63Q] mouse**  
681 **cerebellum.**

682 **A**, RT-qPCR of Wnt-β-catenin target gene expression in SCA1 Tg [63Q] mouse cerebellum at 7,  
683 12, 20, and 30 weeks, normalized to WT littermate controls (n=3-7 animals per genotype). **B**,  
684 Western blot images of β-catenin protein expression (total and active forms) and ataxin-1 protein  
685 expression in whole cerebellar extracts of WT and SCA1 Tg [63Q] mice at 30 weeks. Gapdh was  
686 used as a loading control. **C**, Quantification of total and active β-catenin protein expression levels  
687 from (**B**), normalized to Gapdh and WT expression levels (WT, n=3; SCA1 Tg [63Q], n=4). **D**, RT-  
688 qPCR of *Ctnnb1* mRNA expression in SCA1 Tg [63Q] mouse cerebellum at 30 weeks, normalized

689 to WT littermate controls (n=3 per genotype). **E,F**, Representative images of 12-week  
690 TCF/Lef:H2B-GFP (**E**) and SCA1 Tg [63Q]; TCF/Lef:H2B-GFP (**F**) mouse cerebellar lobule 5,  
691 stained with Calb1 and GFP. Scale bar 100  $\mu$ m, inset 25  $\mu$ m. **G,H**, Quantification of intensity of  
692 Wnt- $\beta$ -catenin signaling activity in PCs, as average GFP intensity in all Calb1<sup>+</sup> cells (**G**), and as  
693 percentage of total PCs counted binned by GFP intensity (**H**) (TCF/Lef:H2B-GFP; SCA1 Tg [63Q],  
694 n=4; TCF/Lef:H2B-GFP, n=3). \*P<0.05, \*\*P<0.01, \*\*\*P<0.001, \*\*\*\*P<0.0001, by student's *t*-test.



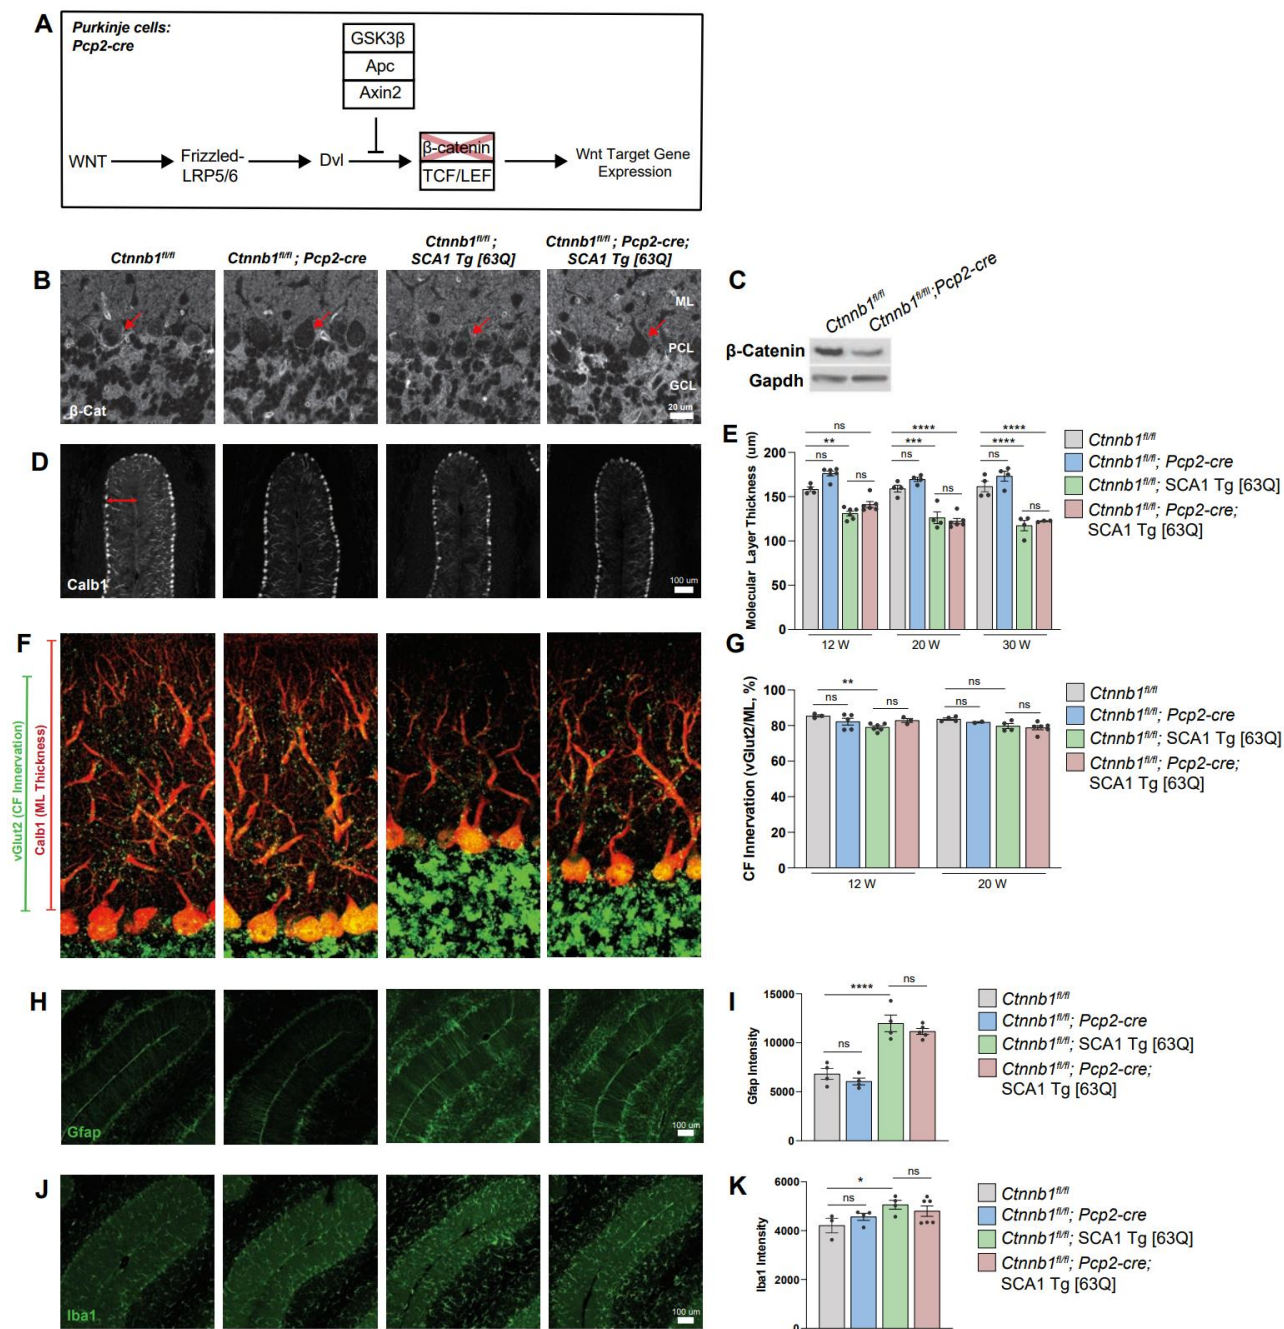

Luttik et al., Figure 4

695  
696  
697  
698  
699  
700  
701  
702  
703  
704

**Figure 4. Loss of Wnt- $\beta$ -catenin signaling in PCs does not prevent SCA1 phenotypes in SCA1 Tg [63Q] mice.**

**A**, Schematic of Wnt- $\beta$ -catenin signaling silencing in PCs by *Ctnnb1* conditional deletion. **B**, Immunohistochemistry showing loss of  $\beta$ -catenin in the PCs of *Ctnnb1* PC cKO (*Ctnnb1<sup>fl/fl</sup>; Pcp2-cre*) mice, with arrows indicating PCs. **C**, Representative Western blot images of  $\beta$ -catenin protein expression in control and *Ctnnb1* PC cKO mice, with Gapdh as loading control. **D,E**, Representative images of Calb1 staining of 20 week cerebellar lobule 5 in control and *Ctnnb1* PC cKO mice on WT and SCA1 Tg [63Q] backgrounds (**D**), to measure molecular layer thickness

705 quantified at 12, 20, and 30 weeks in **(E)**, n=4, 6, 6, 6 (12 weeks), n=4, 4, 4, 6 (20 weeks), n=4,  
706 4, 4, 3 (30 weeks). **F,G**, Representative images of vGlut2 and Calb1 staining of 20-week  
707 cerebellar lobule 5 in control and *Ctnnb1* PC cKO mice on WT and SCA1 Tg [63Q] backgrounds  
708 **(F)**, to quantify climbing fiber (CF) innervation (ratio of vGlut2 / molecular layer thickness) at 12  
709 and 20 weeks **(G)**, n= 4, 6, 6, 6 (12 weeks), n= 4, 4, 4, 6 (20 weeks). **H**, Representative images  
710 of Gfap staining at 20 weeks in control and *Ctnnb1* PC cKO mice, on WT and SCA1 Tg [63Q]  
711 backgrounds, quantified in **(I)**, n=4, 4, 4, 5. **J**, Representative images of Iba1 staining at 20 weeks  
712 in control and *Ctnnb1* PC cKO mice, on WT and SCA1 Tg [63Q] backgrounds, quantified in **(K)**,  
713 n=3, 4, 4, 6. \*P<0.05, \*\*P<0.01, \*\*\*P<0.001, \*\*\*\*P<0.0001, ns, non-significant, by one-way  
714 ANOVA with Tukey's post-hoc analysis.

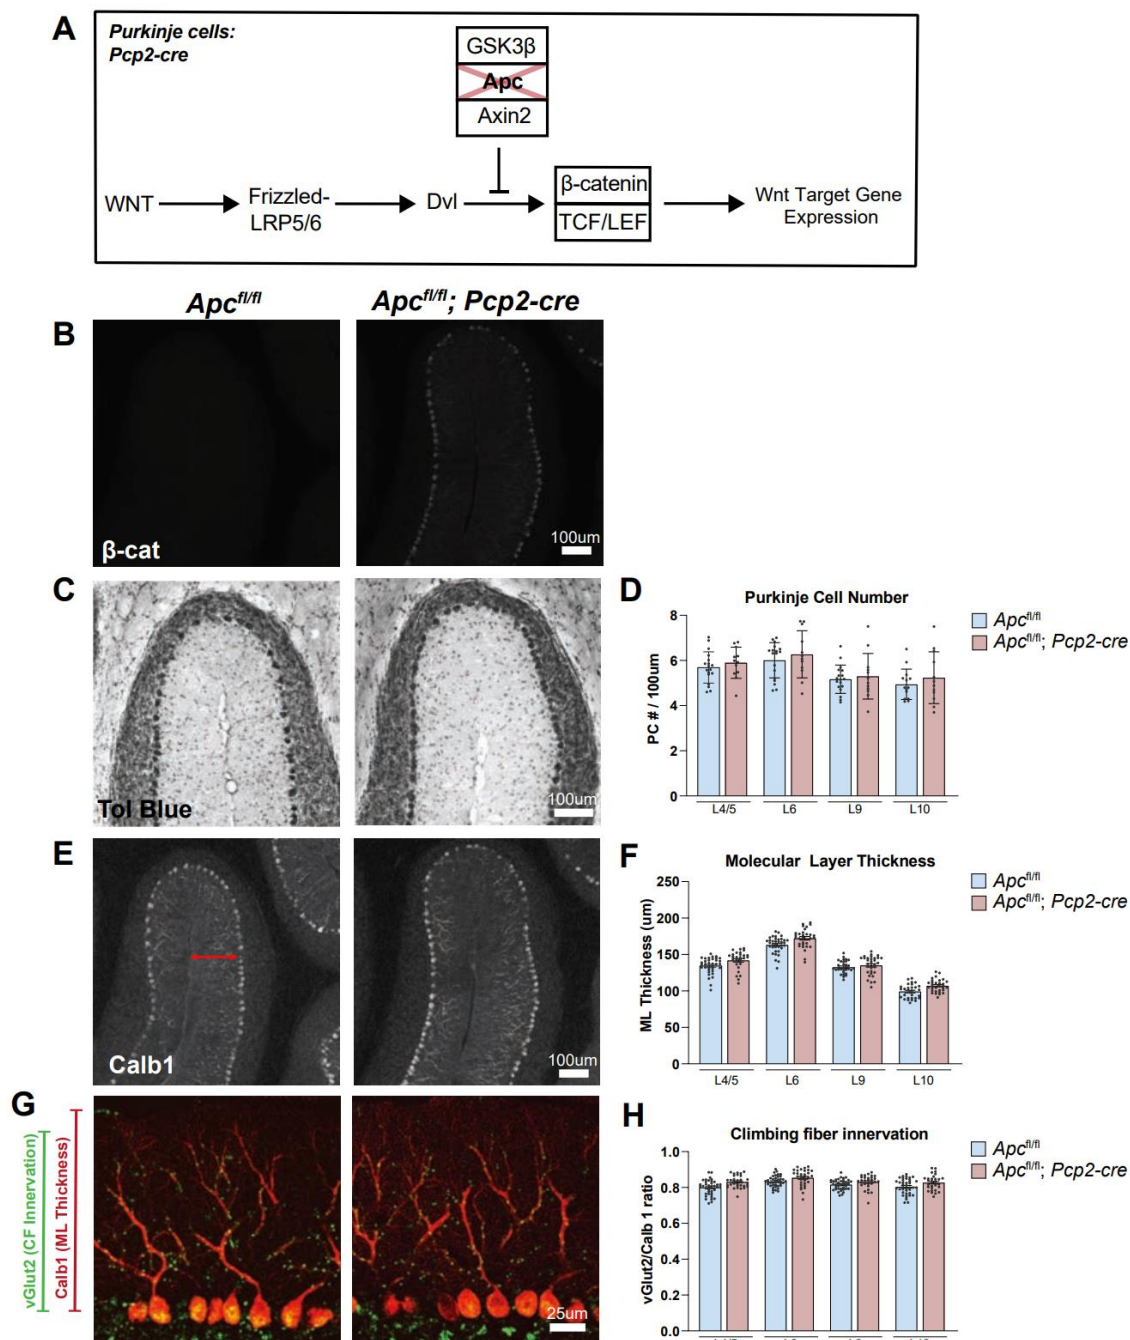

Luttik et al., Figure 5

715  
716  
717  
718  
719  
720  
721  
722  
723

**Figure 5. Ectopic activation of Wnt-β-catenin signaling in PCs does not induce SCA1-like phenotypes.**

**A**, Schematic of Wnt-β-catenin signaling activation in PCs by conditional *Apc* deletion. **B**, Representative images of β-catenin staining in cerebellar lobule 5, showing upregulation of β-catenin intensity in *Apc* PC cKO (*Apc<sup>fl/fl</sup>; Pcp2-cre*) mice compared to controls (*Apc<sup>fl/fl</sup>*). **C-H**, Representative images of toluidine blue (**C**), Calb1 (**E**), and Calb1 and vGlut2 (**G**) staining of cerebellar lobule 5 in 1 year-old control and *Apc* PC cKO mice, quantified in (**D,F,H**). Scale bars

724 100 $\mu$ m (**C,E**), and 25 $\mu$ m (**G**). **D,F,H**, Quantifications of PC number per 100 $\mu$ m (**D**), molecular layer  
725 thickness in  $\mu$ m (**F**), and climbing fiber innervation, as ratio of vGlut2 / molecular layer thickness  
726 (**H**) in lobules 4/5, 6, 9 and 10 of 1 year-old *Apc* PC cKO and control mice, (*Apc* PC cKO n=5,  
727 control n=4). Points in bar plots indicate measurements per image.



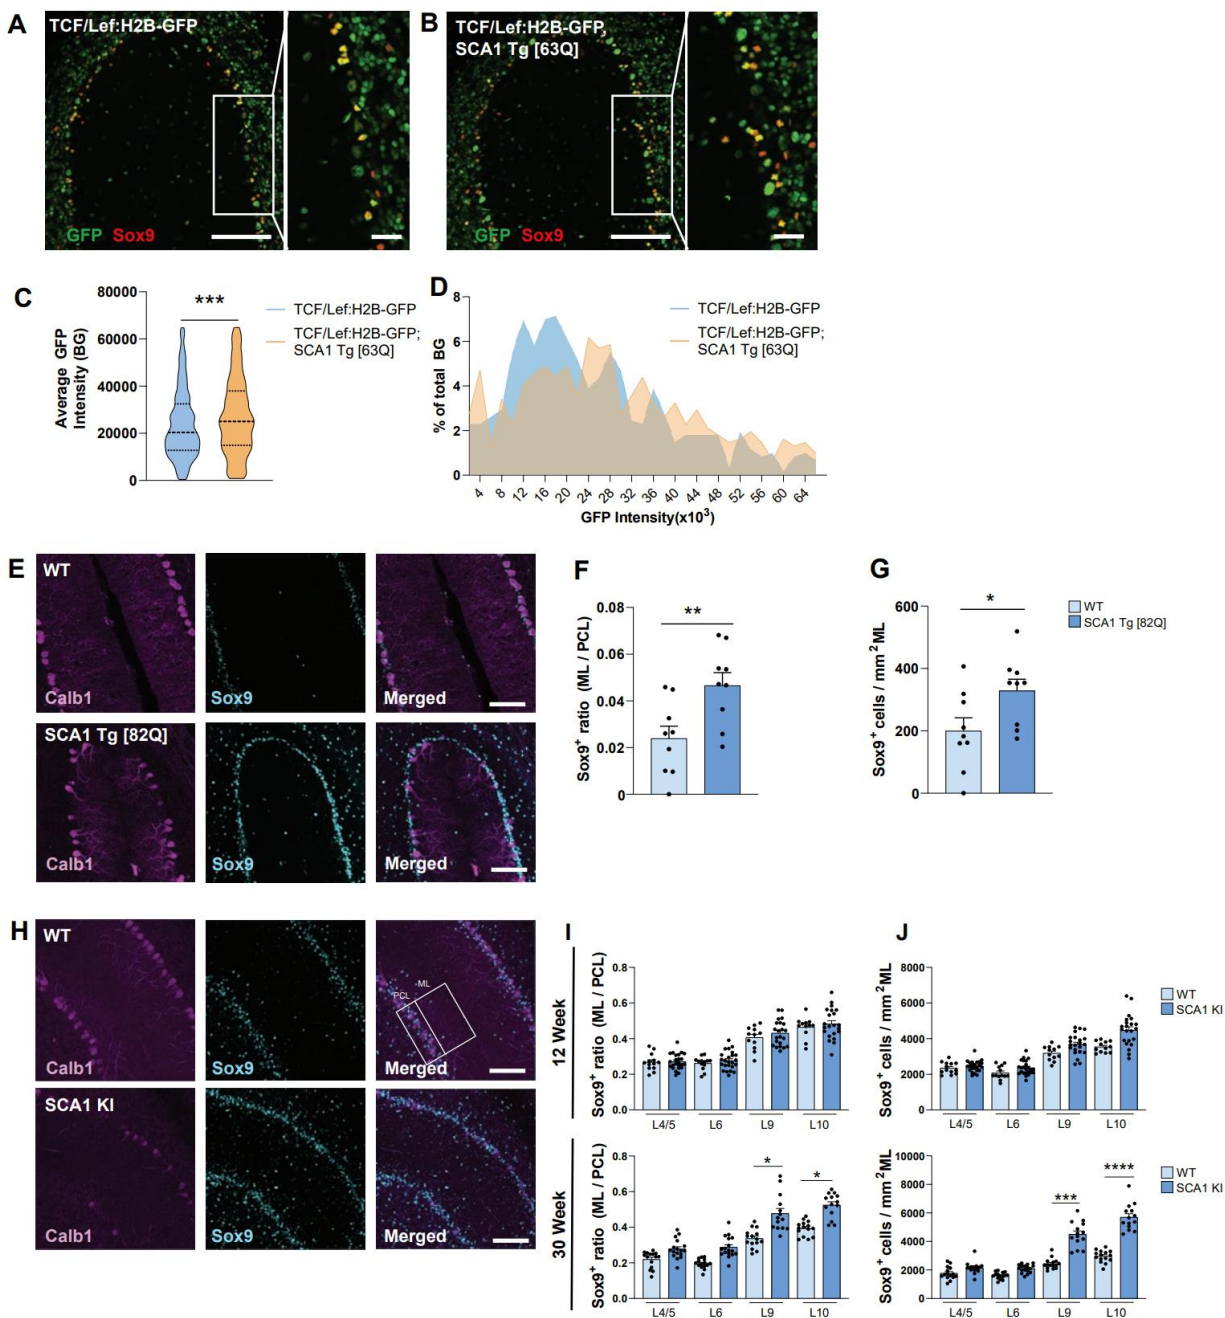

Luttik et al., Figure 6

728  
729  
730  
731  
732  
733  
734  
735  
736  
737  
738

**Figure 6. Non-cell autonomous Wnt-β-catenin signaling activation in BG in SCA1 mice and Sox9 mislocalization phenotypes in SCA1.**

**A-B**, Representative images of 12-week TCF/Lef:H2B-GFP (**A**) and TCF/Lef:H2B-GFP; SCA1 Tg [63Q] (**B**) mouse cerebellar lobule 5, stained with GFP and Sox9. Scale bar 100µm, inset 25µm.  
**C**, Quantification of intensity of Wnt-β-catenin signaling activity in BG, as average GFP intensity in all Sox9<sup>+</sup> cells (**C**), and as percentage of total BG counted binned by GFP intensity (**D**).  
**E**, Representative images of Calb1<sup>+</sup> PCs and Sox9<sup>+</sup> BG in 20-week SCA1 Tg [82Q] and WT cerebellar lobule 4/5. Scale bar 100µm.  
**F,G**, Quantification of ratio of Sox9<sup>+</sup> BG in ML/PCL (**F**), and number of Sox9<sup>+</sup> BG in ML (**G**) in 20-week cerebellar lobules L4/5 SCA1 Tg [82Q] and WT



739 controls (n=3 per genotype). **H**, Representative images of immunostaining for Calb1<sup>+</sup> PCs, and  
740 Sox9<sup>+</sup> BG in 30-week WT and SCA1 KI cerebellar lobule 9. Scale bar 100 $\mu$ m. **I,J**, Quantification  
741 of ratio of Sox9<sup>+</sup> BG in ML/PCL (**I**), and number of Sox9<sup>+</sup> BG in ML (**J**) in 12 week (top row) and  
742 30 week (bottom row) cerebellar lobules L4/5, L6, L9, and L10 for SCA1 KI and WT controls, WT  
743 12-week n=3, WT 30-week n=3, SCA1 KI 12-week n=4, SCA1 KI 30-week n=5. \*P<0.05,  
744 \*\*P<0.01, \*\*\*P<0.001, \*\*\*\*P<0.0001, by student's *t*-test (**C,F,G**), and by one-way ANOVA with  
745 Tukey's post-hoc analysis (**I,J**).
